# Supplementary material for: DAZL Knockout Pigs as Recipients for Spermatogonial Stem Cell Transplantation
Source: MDPI journal article supplement (doi:10.3390/cells12212582), 2023-11-06
Supplement: s1 [file s1]

# ***DAZL* knockout pigs as recipients for spermatogonial stem cell transplantation**

## **(Supplementary Material)**

Nathalia L.M. Lara<sup>1</sup>, Taylor Goldsmith<sup>2</sup>, Paula Rodriguez-Villamil<sup>2</sup>, Felipe Ongaratto<sup>2</sup>, Staci Solin<sup>2</sup>, Dennis Webster<sup>2</sup>, Uyanga Ganbaatar<sup>2</sup>, Shane Hodgson<sup>2</sup>, Stanislas M.A.S. Corbière<sup>2</sup>, Alla Bondareva<sup>1</sup>, Daniel F. Carlson<sup>2</sup>, Ina Dobrinski<sup>1\*</sup>

<sup>1</sup> Faculty of Veterinary Medicine, University of Calgary, AB, Canada.

<sup>2</sup> Recombinetics, Inc., St. Paul, MN, USA.

### **\* Correspondence:**

Ina Dobrinski

idobrins@ucalgary.ca

403-210-6523

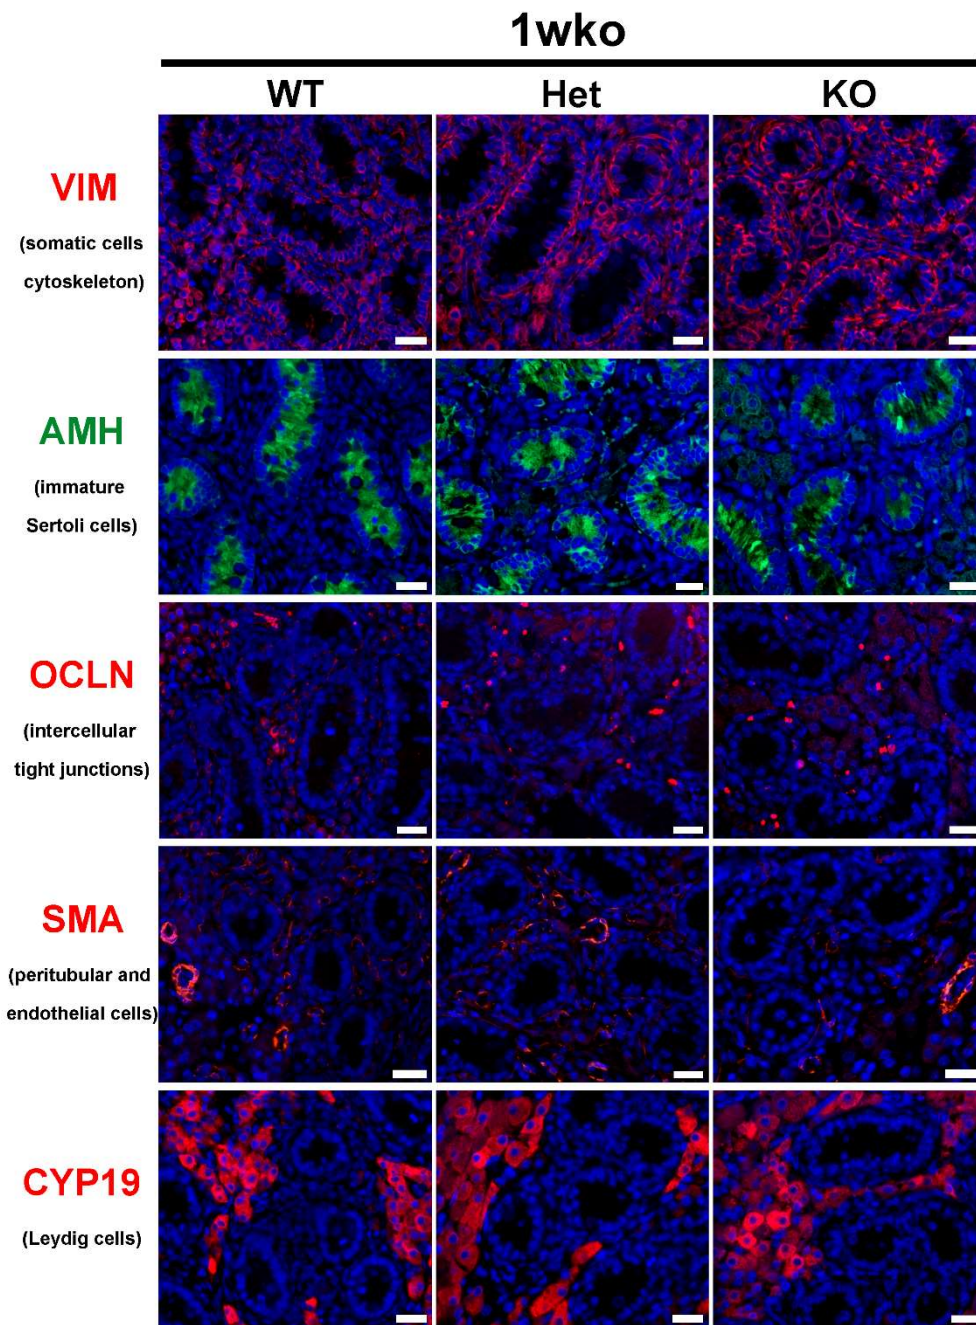

**Supplementary Figure S1. The expression of markers of somatic cell function is similar between WT, Het and *DAZL*-KO pig testis at 1 week of age.** Vimentin (VIM) is an intermediate filament present in the cytoskeleton of testicular somatic cells, anti-Müllerian Hormone (AMH) is produced by immature Sertoli cells, occludin (OCN) is an intercellular tight junction protein, alpha-smooth muscle actin (SMA) is expressed by peritubular myoid and endothelial cells, and aromatase (CYP19) is a steroidogenic enzyme present on Leydig cells. Scale bar = 25µm.

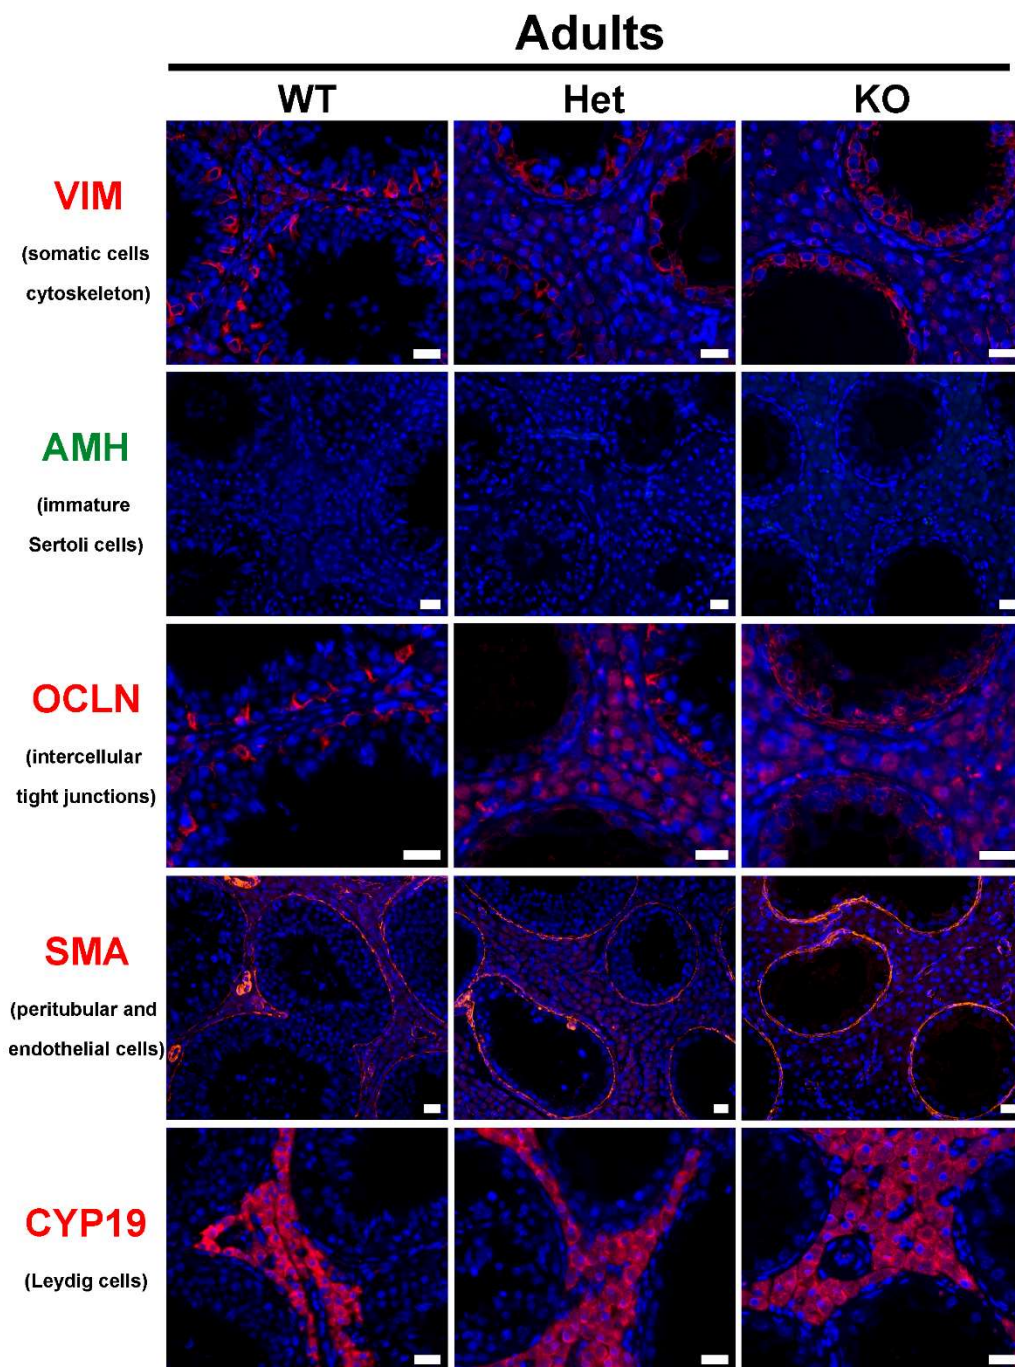

**Supplementary Figure S2. The expression of markers of somatic cell function is similar between WT, Het and *DAZL*-KO pig testis at adulthood.** Vimentin (VIM) is an intermediate filament present in the cytoskeleton of testicular somatic cells, anti-Müllerian Hormone (AMH) is produced by immature Sertoli cells, occludin (OCLN) is a intercellular tight junction protein, alpha-smooth muscle actin (SMA) is expressed by peritubular myoid and endothelial cells, and aromatase (CYP19) is a steroidogenic enzyme present on Leydig cells. Scale bar = 25µm.

**Supplementary Table S1:** List of primers used for single nucleotide polymorphisms (SNP) analysis.

| SNPs | Alt | Location  | Direction | Sequence (5'-3')       | Ta |
|------|-----|-----------|-----------|------------------------|----|
| C    | T   | 1071051   | Forward   | GCATCTGCCTCTATTTTGTGTT | 65 |
|      |     |           | Reverse   | CCATGGCAGGCAGAAAGTT    |    |
| C    | T   | 2778674   | Forward   | CAGGTGGTGGGAAGAAAAGA   | 65 |
|      |     |           | Reverse   | ATGCACAGAGGTGCACACA    |    |
| G    | T   | 3144768   | Forward   | GCTCTTTGGGAATTCACACTTT | 60 |
|      |     |           | Reverse   | TTTGCACATGTCCTGGAGAG   |    |
| C    | A   | 6537618   | Forward   | CGGAGTTTTTCAGTTGGCTTC  | 65 |
|      |     |           | Reverse   | TTACGAGGAACAAAGCAGACC  |    |
| A    | G   | 6788853   | Forward   | CCTGGAGACCTCAAGCTCCT   | 65 |
|      |     |           | Reverse   | TACACACAGACGTGCCCCTA   |    |
| G    | T   | 8710551   | Forward   | CCCATGCGTTAGTATAGCTGTG | 65 |
|      |     |           | Reverse   | CGAAAGCCTCAGGTTCCCTT   |    |
| T    | C   | 15331319  | Forward   | GGCAGACAAGCTGTTGTCAC   | 65 |
|      |     |           | Reverse   | GGGGTGTGTGGGTAACAGAG   |    |
| T    | C   | 24267515  | Forward   | CTTCCCATAGCCTGTGCAAT   | 60 |
|      |     |           | Reverse   | CCGCTTTTGTGAAGTTTTC    |    |
| T    | C   | 36589903  | Forward   | AGCTCGTGATCCTGTTGCTT   | 65 |
|      |     |           | Reverse   | TATTCTCCTTGCTGGGCTTG   |    |
| T    | C   | 40206250  | Forward   | CAGCTACCATGCTGTGAGGA   | 65 |
|      |     |           | Reverse   | GAGATGACACGAAGGCAAGA   |    |
| T    | C   | 115838003 | Forward   | GCCCTAAAGCCAATCCATTT   | 65 |
|      |     |           | Reverse   | TAAATGCTGGACGCATCAAC   |    |
| A    | G   | 127411174 | Forward   | GTTTCCCCTTTTCCTGATCC   | 65 |
|      |     |           | Reverse   | CTCGGGTGGAGTCTCTGAAG   |    |
| C    | T   | 127491880 | Forward   | GGGGGAGTACATGTGGTCTG   | 65 |
|      |     |           | Reverse   | CATCTACGCATGCCTTTCAA   |    |
| A    | G   | 127725116 | Forward   | CCAGAGCCGTTTCATTCCT    | 65 |
|      |     |           | Reverse   | CAGATACAGCCCGAGCAAAT   |    |

Ta = Primer annealing temperature.

**Supplementary Table S2:** List of antibodies used.

| <b>Target</b>   | <b>Manufacturer</b> | <b>Catalog number</b> | <b>Dilution</b> | <b>Species</b>     |
|-----------------|---------------------|-----------------------|-----------------|--------------------|
| UCH-L1          | Abcam               | ab108986              | 1:100           | Rabbit anti-human  |
| TNP1            | Abcam               | ab73135               | 1:100           | Rabbit anti-human  |
| PCNA            | Dako                | M0879                 | 1:100           | Mouse anti-rat     |
| VIM             | Abcam               | ab92547               | 1:200           | Rabbit anti-human  |
| AMH             | Santa Cruz          | sc-6886               | 1:400           | Goat anti-human    |
| OCLN            | Proteintech         | 66378-1               | 1:150           | Mouse anti-human   |
| SMA             | Abcam               | ab7817                | 1:200           | Mouse anti-human   |
| CYP19           | Bio-Rad             | MCA20775              | 1:400           | Mouse anti-human   |
| Alexa Fluor 488 | ThermoFisher        | A11055                | 1:500           | Donkey anti-goat   |
| Alexa Fluor 594 | ThermoFisher        | A21203                | 1:500           | Donkey anti-mouse  |
| Alexa Fluor 594 | ThermoFisher        | A21207                | 1:500           | Donkey anti-rabbit |
| Alexa Fluor 488 | ThermoFisher        | A21206                | 1:500           | Donkey anti-rabbit |
